# Supplementary material
Source: Springer Nature journal article supplement (https://www.springermedizin.de/resource/supplementary/12245_2011_87_MOESM2_ESM.pdf/9672736)
Supplement: MOESM2 [file 9672736]

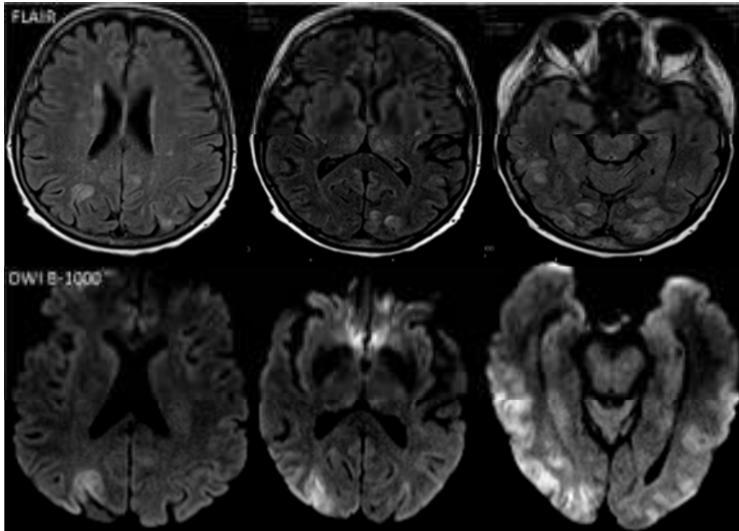

The MRI images show acute water restriction in the DWI and high signal in the FLAIR sequence in the same territory of the earlier CTP abnormalities confirming the diagnosis of PRES.
